# Supplementary material
Source: Springer Nature journal article supplement (https://www.springermedizin.de/resource/supplementary/13012_2008_182_MOESM2_ESM.pdf/9629422)
Supplement: MOESM2 [file 9629422]

QUERI-DM Implementation Framework  
CONTEXT

ADDITIONAL FILE 2: Matrix of Constructs from Models in the Literature to CFIR Constructs

Damschroder LJ, Aron DC, Keith RE, Kirsh SR, Alexander JA, Lowery JC: Fostering implementation of health services research findings into practice: A consolidated framework for advancing implementation science

See Table 1 in main paper for full citations: 1 2 3 4 5 6 7 8 9 10 11 12 13 14 15 16 17 18 19

| Code                                      | Topic/Description                                  | Greenhalgh et al. <sup>13</sup> | Klein, Conn & Sorra <sup>10,47</sup> | Pettigrew & Whipp <sup>26</sup> | Leeman <sup>44</sup> | PARHS Model <sup>14,15</sup> | Ottawa Model <sup>50</sup> | Simpson <sup>70</sup> | Kochevar & Yano <sup>46</sup> | Stetler <sup>39</sup> | Edmondson et al. <sup>19</sup> | Kilbourne et al. | VanDeusen Lukas et al. <sup>80</sup> | Grol, et al. <sup>7,106</sup> | Mendel et al. <sup>27</sup> | Fixsen et al. <sup>16</sup> | Brach et al. <sup>99</sup> | Glisson et al. <sup>100</sup> | Feldstein & Glasgow <sup>43</sup> | Frambach & Schillewaert <sup>35</sup> |   |
|-------------------------------------------|----------------------------------------------------|---------------------------------|--------------------------------------|---------------------------------|----------------------|------------------------------|----------------------------|-----------------------|-------------------------------|-----------------------|--------------------------------|------------------|--------------------------------------|-------------------------------|-----------------------------|-----------------------------|----------------------------|-------------------------------|-----------------------------------|---------------------------------------|---|
| <b>I. INTERVENTION CHARACTERISTICS</b>    |                                                    |                                 |                                      |                                 |                      |                              |                            |                       |                               |                       |                                |                  |                                      |                               |                             |                             |                            |                               |                                   |                                       |   |
| A                                         | Intervention Source                                |                                 |                                      | ✓                               |                      |                              |                            |                       |                               | ✓                     | ✓                              |                  |                                      | ✓                             |                             |                             |                            |                               |                                   |                                       |   |
| B                                         | Evidence Strength & Quality                        |                                 |                                      |                                 | ✓                    | ✓                            | ✓                          |                       |                               | ✓                     | ✓                              | ✓                |                                      |                               | ✓                           | ✓                           | ✓                          |                               | ✓                                 | ✓                                     | ✓ |
| C                                         | Relative advantage                                 | ✓                               |                                      |                                 |                      | ✓                            |                            |                       |                               | ✓                     | ✓                              |                  |                                      | ✓                             | ✓                           |                             | ✓                          |                               | ✓                                 | ✓                                     | ✓ |
| D                                         | Adaptability                                       | ✓                               | ✓                                    | ✓                               | ✓                    | ✓                            |                            |                       |                               | ✓                     |                                | ✓                |                                      | ✓                             |                             |                             | ✓                          |                               | ✓                                 | ✓                                     | ✓ |
| E                                         | Trialability                                       | ✓                               | ✓                                    |                                 | ✓                    | ✓                            |                            |                       |                               | ✓                     |                                | ✓                |                                      | ✓                             |                             |                             |                            |                               | ✓                                 | ✓                                     | ✓ |
| F                                         | Complexity                                         | ✓                               | ✓                                    |                                 |                      |                              |                            |                       | ✓                             | ✓                     | ✓                              |                  |                                      | ✓                             | ✓                           |                             | ✓                          |                               | ✓                                 | ✓                                     | ✓ |
| G                                         | Design Quality and Packaging                       |                                 | ✓                                    |                                 |                      |                              | ✓                          |                       |                               | ✓                     |                                | ✓                |                                      | ✓                             | ✓                           |                             | ✓                          |                               | ✓                                 | ✓                                     | ✓ |
| H                                         | Cost                                               |                                 |                                      |                                 |                      |                              | ✓                          |                       |                               |                       |                                | ✓                |                                      | ✓                             | ✓                           |                             | ✓                          |                               | ✓                                 | ✓                                     | ✓ |
| <b>II. OUTER SETTING</b>                  |                                                    |                                 |                                      |                                 |                      |                              |                            |                       |                               |                       |                                |                  |                                      |                               |                             |                             |                            |                               |                                   |                                       |   |
| A                                         | Patient Needs & Resources                          |                                 |                                      | ✓                               |                      | ✓                            | ✓                          |                       |                               |                       |                                | ✓                | ✓                                    | ✓                             | ✓                           |                             |                            | ✓                             | ✓                                 | ✓                                     | ✓ |
| B                                         | Cosmopolitanism                                    | ✓                               |                                      | ✓                               |                      |                              |                            | ✓                     |                               |                       |                                |                  |                                      | ✓                             |                             |                             |                            | ✓                             |                                   |                                       | ✓ |
| C                                         | Peer Pressure                                      | ✓                               |                                      | ✓                               |                      |                              |                            |                       |                               |                       |                                | ✓                | ✓                                    | ✓                             | ✓                           |                             |                            |                               | ✓                                 | ✓                                     | ✓ |
| D                                         | External Policies & Incentives                     | ✓                               |                                      | ✓                               |                      |                              |                            |                       |                               |                       |                                |                  | ✓                                    | ✓                             | ✓                           |                             | ✓                          |                               | ✓                                 | ✓                                     | ✓ |
| <b>III. INNER SETTING</b>                 |                                                    |                                 |                                      |                                 |                      |                              |                            |                       |                               |                       |                                |                  |                                      |                               |                             |                             |                            |                               |                                   |                                       |   |
| A                                         | Structural Characteristics                         | ✓                               |                                      | ✓                               |                      |                              |                            |                       |                               |                       |                                |                  |                                      |                               | ✓                           |                             |                            |                               |                                   |                                       | ✓ |
| B                                         | Networks & Communications                          | ✓                               | ✓                                    | ✓                               |                      | ✓                            | ✓                          | ✓                     |                               |                       |                                |                  | ✓                                    | ✓                             | ✓                           |                             | ✓                          | ✓                             | ✓                                 | ✓                                     | ✓ |
| C                                         | Culture                                            | ✓                               | ✓                                    | ✓                               |                      | ✓                            | ✓                          | ✓                     |                               |                       |                                |                  | ✓                                    | ✓                             | ✓                           |                             |                            | ✓                             | ✓                                 | ✓                                     | ✓ |
| D                                         | Implementation Climate                             |                                 |                                      | ✓                               |                      |                              |                            |                       |                               |                       |                                |                  |                                      |                               | ✓                           |                             |                            |                               | ✓                                 |                                       | ✓ |
| 1                                         | Tension for Change                                 | ✓                               |                                      | ✓                               |                      |                              |                            |                       |                               | ✓                     |                                | ✓                | ✓                                    |                               |                             |                             | ✓                          |                               |                                   |                                       | ✓ |
| 2                                         | Compatibility                                      | ✓                               | ✓                                    |                                 |                      |                              |                            | ✓                     | ✓                             | ✓                     | ✓                              |                  |                                      | ✓                             | ✓                           |                             | ✓                          |                               | ✓                                 | ✓                                     | ✓ |
| 3                                         | Relative Priority                                  |                                 | ✓                                    |                                 |                      |                              |                            |                       |                               | ✓                     |                                |                  |                                      |                               | ✓                           |                             |                            |                               | ✓                                 | ✓                                     | ✓ |
| 4                                         | Organizational Incentives & Rewards                |                                 | ✓                                    | ✓                               | ✓                    |                              |                            |                       |                               |                       |                                | ✓                | ✓                                    | ✓                             | ✓                           |                             |                            |                               | ✓                                 | ✓                                     | ✓ |
| 5                                         | Goals and Feedback                                 | ✓                               |                                      | ✓                               |                      | ✓                            |                            | ✓                     | ✓                             |                       |                                | ✓                | ✓                                    | ✓                             | ✓                           |                             |                            |                               | ✓                                 | ✓                                     | ✓ |
| 6                                         | Learning Climate                                   | ✓                               | ✓                                    |                                 |                      | ✓                            | ✓                          | ✓                     |                               |                       |                                |                  | ✓                                    |                               |                             |                             |                            |                               | ✓                                 | ✓                                     | ✓ |
| D                                         | Readiness for Implementation                       |                                 |                                      | ✓                               |                      |                              |                            |                       |                               |                       |                                |                  |                                      |                               |                             |                             |                            |                               | ✓                                 | ✓                                     | ✓ |
| 1                                         | Leadership Engagement                              | ✓                               | ✓                                    | ✓                               | ✓                    | ✓                            |                            | ✓                     |                               | ✓                     | ✓                              |                  | ✓                                    |                               |                             |                             | ✓                          |                               | ✓                                 | ✓                                     | ✓ |
| 2                                         | Available Resources                                | ✓                               | ✓                                    | ✓                               |                      | ✓                            |                            | ✓                     |                               | ✓                     | ✓                              |                  | ✓                                    |                               | ✓                           |                             | ✓                          |                               | ✓                                 | ✓                                     | ✓ |
| 3                                         | Access to knowledge and information                | ✓                               | ✓                                    |                                 | ✓                    | ✓                            |                            | ✓                     |                               |                       |                                | ✓                |                                      |                               |                             |                             | ✓                          |                               | ✓                                 | ✓                                     | ✓ |
| <b>IV. CHARACTERISTICS OF INDIVIDUALS</b> |                                                    |                                 |                                      |                                 |                      |                              |                            |                       |                               |                       |                                |                  |                                      |                               |                             |                             |                            |                               |                                   |                                       |   |
| A                                         | Knowledge & Beliefs about the Intervention         | ✓                               |                                      | ✓                               |                      | ✓                            |                            |                       |                               |                       |                                |                  | ✓                                    | ✓                             | ✓                           |                             | ✓                          |                               | ✓                                 | ✓                                     | ✓ |
| B                                         | Self-efficacy                                      | ✓                               | ✓                                    |                                 |                      |                              |                            |                       |                               |                       |                                |                  | ✓                                    | ✓                             | ✓                           |                             |                            |                               | ✓                                 | ✓                                     | ✓ |
| C                                         | Individual Stage of Change                         | ✓                               | ✓                                    |                                 |                      |                              |                            |                       |                               |                       |                                |                  |                                      | ✓                             | ✓                           |                             |                            |                               | ✓                                 | ✓                                     | ✓ |
| D                                         | Individual Identification with Organization        |                                 |                                      |                                 |                      |                              |                            |                       |                               |                       |                                |                  |                                      |                               | ✓                           |                             | ✓                          | ✓                             |                                   |                                       | ✓ |
| E                                         | Other Personal Attributes                          |                                 |                                      |                                 |                      |                              |                            |                       |                               |                       |                                |                  | ✓                                    | ✓                             |                             |                             |                            |                               |                                   |                                       | ✓ |
| <b>V. PROCESS</b>                         |                                                    |                                 |                                      |                                 |                      |                              |                            |                       |                               |                       |                                |                  |                                      |                               |                             |                             |                            |                               |                                   |                                       |   |
| A                                         | Planning                                           | ✓                               |                                      | ✓                               |                      | ✓                            |                            |                       |                               | ✓                     |                                | ✓                |                                      | ✓                             | ✓                           | ✓                           | ✓                          | ✓                             | ✓                                 | ✓                                     | ✓ |
| B                                         | Engaging                                           | ✓                               |                                      | ✓                               |                      |                              |                            |                       |                               | ✓                     | ✓                              | ✓                | ✓                                    | ✓                             | ✓                           | ✓                           | ✓                          | ✓                             | ✓                                 | ✓                                     | ✓ |
| 1                                         | Opinion Leaders                                    | ✓                               |                                      |                                 |                      | ✓                            |                            |                       |                               |                       | ✓                              | ✓                |                                      | ✓                             |                             |                             | ✓                          |                               | ✓                                 | ✓                                     | ✓ |
| 2                                         | Formally appointed internal implementation leaders |                                 |                                      | ✓                               |                      |                              |                            |                       |                               |                       |                                |                  |                                      |                               |                             |                             | ✓                          | ✓                             | ✓                                 | ✓                                     | ✓ |
| 3                                         | Champions                                          | ✓                               |                                      |                                 |                      |                              |                            |                       |                               |                       |                                |                  | ✓                                    |                               |                             |                             | ✓                          |                               | ✓                                 | ✓                                     | ✓ |
| 4                                         | External Change Agents                             | ✓                               |                                      |                                 |                      |                              |                            |                       |                               |                       |                                |                  |                                      | ✓                             |                             |                             | ✓                          | ✓                             | ✓                                 | ✓                                     | ✓ |
| C                                         | Executing                                          | ✓                               |                                      | ✓                               |                      |                              |                            |                       |                               | ✓                     |                                | ✓                |                                      | ✓                             | ✓                           |                             |                            |                               | ✓                                 | ✓                                     | ✓ |
| D                                         | Reflecting & Evaluating                            | ✓                               |                                      | ✓                               |                      |                              |                            |                       |                               | ✓                     | ✓                              | ✓                |                                      | ✓                             | ✓                           | ✓                           | ✓                          | ✓                             | ✓                                 | ✓                                     | ✓ |
